# Supplementary material for: Effects of Exercise Rehabilitation on Cardiorespiratory Fitness in Long-COVID-19 Survivors: A Meta-Analysis
Source: MDPI journal article supplement (doi:10.3390/jcm13123621), 2024-06-20
Supplement: s1 [file s1]

**Table S1** Search strategy

| Databases     | Steps | Search terms                                                                                                                                                                                                                 | Results    |
|---------------|-------|------------------------------------------------------------------------------------------------------------------------------------------------------------------------------------------------------------------------------|------------|
| <b>PubMed</b> | #1    | ('covid'[Title/Abstract] OR 'coronavirus'[Title/Abstract])                                                                                                                                                                   | 385,336    |
|               | #2    | ('cardiorespiratory fitness'[Title/Abstract] OR 'physical fitness'[Title/Abstract] OR 'cardiopulmonary fitness'[Title/Abstract] OR 'fitness performance'[Title/Abstract] OR 'cardiorespiratory performance'[Title/Abstract]) | 47,696     |
|               | #3    | #1 AND #2 Sort by: Best Match                                                                                                                                                                                                | <b>509</b> |
| <b>CINAHL</b> | #S1   | AB 'covid' OR AB 'coronavirus'                                                                                                                                                                                               | 61,966     |
|               | #S2   | AB cardiorespiratory fitness OR AB physical fitness OR AB cardiopulmonary fitness OR fitness performance OR AB cardiorespiratory performance                                                                                 | 13,227     |
|               | #S3   | (AB #S1) AND (AB #S2)                                                                                                                                                                                                        | <b>122</b> |
| <b>Scopus</b> | #1    | TITLE-ABS-KEY ('covid' OR 'coronavirus')                                                                                                                                                                                     | 577,065    |
|               | #2    | TITLE-ABS-KEY ('cardiorespiratory fitness' OR 'physical fitness' OR 'cardiopulmonary fitness' OR 'fitness performance' OR 'cardiorespiratory performance')                                                                   | 52,182     |
|               | #3    | #1 AND #2                                                                                                                                                                                                                    | <b>652</b> |
| <b>Embase</b> | #1    | 'covid'/exp 'covid' OR 'coronavirus':ab,ti                                                                                                                                                                                   | 397,868    |
|               | #2    | 'cardiorespiratory fitness' OR 'physical fitness' OR 'cardiopulmonary fitness' OR 'fitness performance' OR 'cardiorespiratory performance':ab,ti                                                                             | 34,632     |
|               | #3    | #1 AND #2                                                                                                                                                                                                                    | <b>463</b> |

| <b>Databases</b> | <b>Steps</b> | <b>Search terms</b>                                                                                                                                                                                | <b>Results</b> |
|------------------|--------------|----------------------------------------------------------------------------------------------------------------------------------------------------------------------------------------------------|----------------|
| <b>Cochrane</b>  | #1           | ('covid'):ti,ab,kw OR ('coronavirus'): ti,ab,kw                                                                                                                                                    | 15,530         |
|                  | #2           | ('cardiorespiratory fitness'): ti,ab,kw OR ('physical fitness'):ti,ab,kw OR ('cardiopulmonary fitness'):ti,ab,kw OR ('fitness performance'):ti,ab,kw OR ('cardiorespiratory performance'):ti,ab,kw | 10,329         |
|                  | #3           | #1 AND #2                                                                                                                                                                                          | <b>147</b>     |

**Table S2** Excluded studies

| References                      | Reason for exclusion                                                    |
|---------------------------------|-------------------------------------------------------------------------|
| ACTRN12622000742774 (2022) [56] | Protocol                                                                |
| Ahmed (2020) [57]               | Protocol                                                                |
| Anastasio (2022) [58]           | Observational study                                                     |
| Aparisi (2021) [59]             | Observational study                                                     |
| Arena (2021) [60]               | Review                                                                  |
| Azmodeh (2022) [61]             | Observational study                                                     |
| Back (2022) [10]                | Observational study                                                     |
| Baricich (2021) [62]            | Observational study                                                     |
| Bellmunt (2021) [63]            | Protocol                                                                |
| Blokland (2020) [64]            | Observational study                                                     |
| Bohn (2021) [65]                | Investigating in older adults without post- and long-COVID-19 infection |
| Botek (2022) [66]               | No exercise intervention                                                |
| Brandenburg (2021) [67]         | Observational study                                                     |
| Brawner (2021) [68]             | No CRF outcome                                                          |
| Cafiero (2021) [69]             | Observational study                                                     |
| Cancino-López (2021) [70]       | Observational study                                                     |
| Christensen (2021) [71]         | Observational study                                                     |

| References                              | Reason for exclusion                                                    |
|-----------------------------------------|-------------------------------------------------------------------------|
| Cramer (2020) [72]                      | Observational study                                                     |
| CTRI (2021) [73]                        | Protocol                                                                |
| Cuenca-Zaldivar (2022) [74]             | No CRF outcome                                                          |
| Debeaumont (2021) [75]                  | Observational study                                                     |
| Delevatti (2022) [76]                   | Protocol                                                                |
| Drks (2022) [77]                        | Protocol                                                                |
| Fereydounnia (2022) [78]                | No exercise intervention                                                |
| Gattoni (2022) [79]                     | Observational study                                                     |
| Geijerstam (2021) [80]                  | Observational study                                                     |
| Ekblom-Bak (2021) [11]                  | Observational study                                                     |
| Hail University Poly Clinic (2022) [81] | Protocol                                                                |
| Hekmatikar (2021) [82]                  | Protocol                                                                |
| Hermann (2020) [83]                     | Investigating in participants without post- and long-COVID-19 infection |
| Heubel (2020) [84]                      | Protocol                                                                |
| Jafarnezhadgero (2022) [85]             | Observational study                                                     |
| Jimeno-Almazán (2021) [86]              | Observational study                                                     |
| Jimeno-Almazán (2022) [87]              | Observational study                                                     |
| Kisiel (2022) [88]                      | Observational study                                                     |
| Ladlow (2022) [12]                      | Observational study                                                     |

| References               | Reason for exclusion       |
|--------------------------|----------------------------|
| Millet (2022) [89]       | Observational study        |
| Milovancev (2021) [90]   | Observational study        |
| Mitropoulos (2022) [91]  | Observational study        |
| Pleguezuelos (2023) [92] | Unavailable numerical data |
| Schaeffer (2022) [93]    | Observational study        |
| Skjørten (2021) [94]     | Observational study        |
| Stavrou (2022) [95]      | Observational study        |
| Trapé (2021) [96]        | Protocol                   |
| Williamson (2021) [97]   | No full text               |
| Windt (2022) [98]        | Unavailable numerical data |
| Wood (2022) [99]         | Observational study        |
| Xiong (2021) [100]       | Observational study        |

**Table S3** A revised Cochrane risk-of-bias tool for randomized trials (RoB 2)

| Author (year)              | RoB 2                                                         |                                                                                                                          |                                                                                                                        |                                |                                                      |                                                            |                      |
|----------------------------|---------------------------------------------------------------|--------------------------------------------------------------------------------------------------------------------------|------------------------------------------------------------------------------------------------------------------------|--------------------------------|------------------------------------------------------|------------------------------------------------------------|----------------------|
|                            | Domain 1: Risk of bias arising from the randomization process | Domain 2: Risk of bias due to deviations from the intended interventions ( <i>effect of assignment to intervention</i> ) | Domain 2: Risk of bias due to deviations from the intended interventions ( <i>effect of adhering to intervention</i> ) | Domain 3: Missing outcome data | Domain 4: Risk of bias in measurement of the outcome | Domain 5: Risk of bias in selection of the reported result | Overall risk of bias |
| Amaral (2022) [21]         | +                                                             | -                                                                                                                        | +                                                                                                                      | +                              | +                                                    | +                                                          | -                    |
| Furtado (2023) [39]        | +                                                             | -                                                                                                                        | -                                                                                                                      | +                              | -                                                    | -                                                          | -                    |
| Li (2021) [40]             | +                                                             | +                                                                                                                        | +                                                                                                                      | +                              | +                                                    | +                                                          | +                    |
| Longobardi (2023) [41]     | +                                                             | +                                                                                                                        | +                                                                                                                      | +                              | +                                                    | +                                                          | +                    |
| Jimeno-Almazán (2023) [29] | +                                                             | ?                                                                                                                        | +                                                                                                                      | +                              | -                                                    | +                                                          | -                    |

Judgement: -, High; ?, Unclear; +, Low

**Table S4** Risk of bias in non-randomized studies-of interventions (ROBINS-I)

| Author (year)              | ROBINS-I                          |                                                            |                                                   |                                                              |                                    |                                           |                                                    |              |
|----------------------------|-----------------------------------|------------------------------------------------------------|---------------------------------------------------|--------------------------------------------------------------|------------------------------------|-------------------------------------------|----------------------------------------------------|--------------|
|                            | Domain 1: Bias due to confounding | Domain 2: Bias in selection of participants into the study | Domain 3: Bias in classification of interventions | Domain 4: Bias due to deviations from intended interventions | Domain 5: Bias due to missing data | Domain 6: Bias in measurement of outcomes | Domain 7: Bias in selection of the reported result | Overall bias |
| Ahmed (2022) [20]          | L                                 | L                                                          | L                                                 | L                                                            | L                                  | M                                         | L                                                  | M            |
| Calvo-Paniagua (2022) [22] | L                                 | L                                                          | L                                                 | L                                                            | L                                  | L                                         | L                                                  | L            |
| Compagno (2022) [23]       | L                                 | L                                                          | L                                                 | L                                                            | L                                  | M                                         | L                                                  | M            |
| Everaerts (2020) [42]      | L                                 | L                                                          | L                                                 | L                                                            | L                                  | M                                         | L                                                  | M            |
| Gloeckl (2021) [43]        | L                                 | L                                                          | L                                                 | L                                                            | L                                  | M                                         | L                                                  | M            |
| Ostrowska (2023) [44]      | L                                 | L                                                          | L                                                 | NI                                                           | L                                  | L                                         | L                                                  | M            |
| Stavrou (2021) [45]        | L                                 | L                                                          | L                                                 | L                                                            | L                                  | M                                         | L                                                  | M            |

Judgement: L, Low; M, Moderate; NI, No information

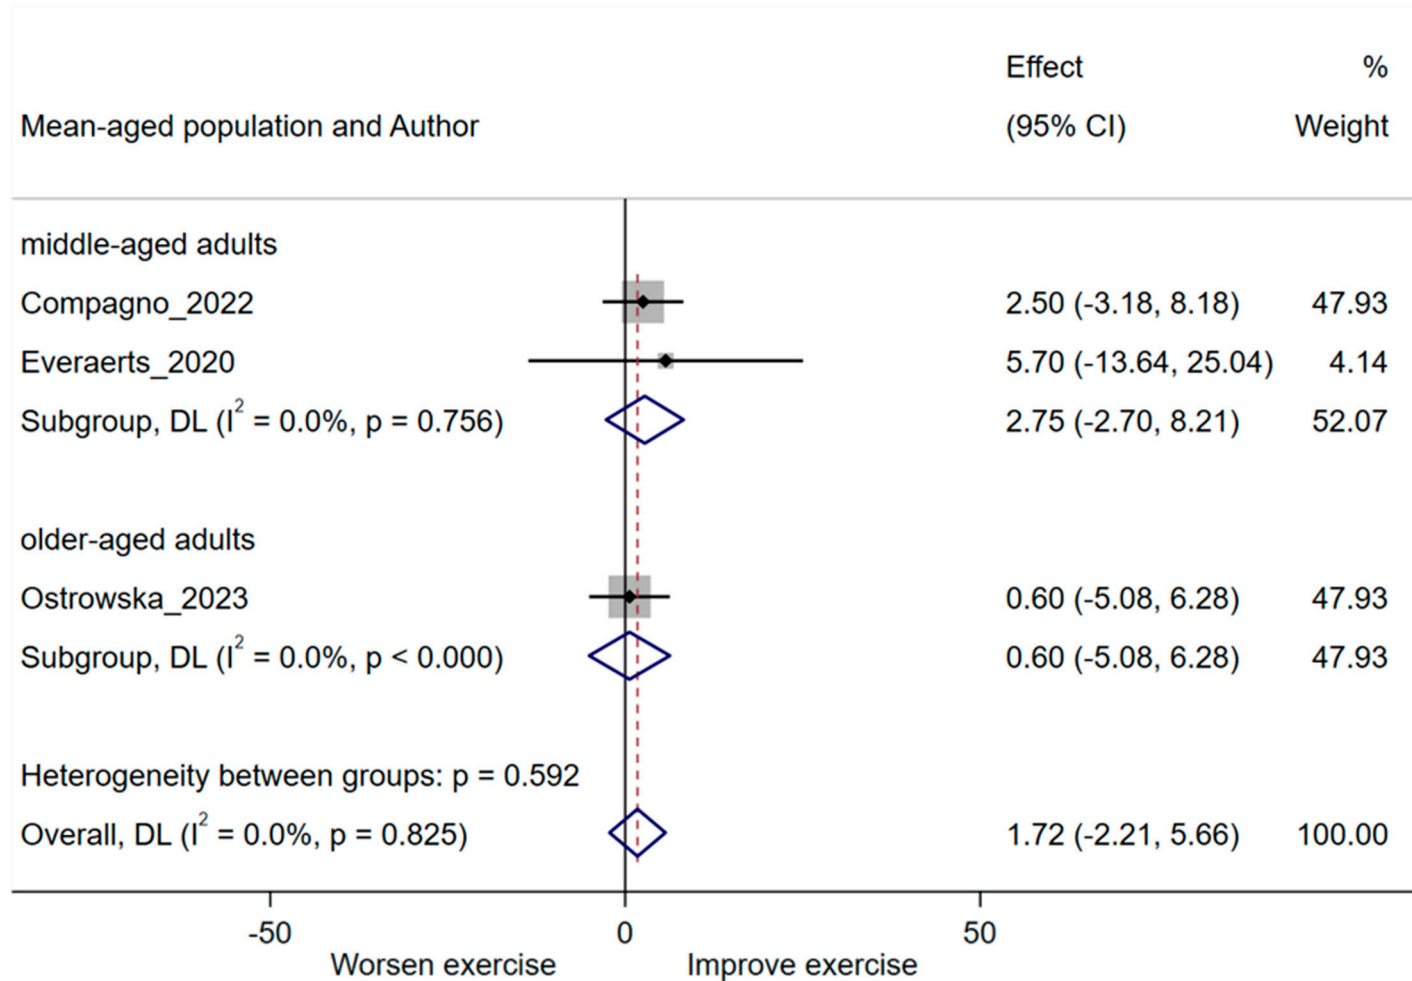

NOTE: Weights and between-subgroup heterogeneity test are from random-effects model

**Figure S1** Subgroup analysis of non-randomized controlled trials by mean-aged population. CI, confidence interval; Effect, weighted mean difference;  $VO_{2peak}$ , peak oxygen consumption [23,42,44].



**Figure S2** Subgroup analysis for 6MWD

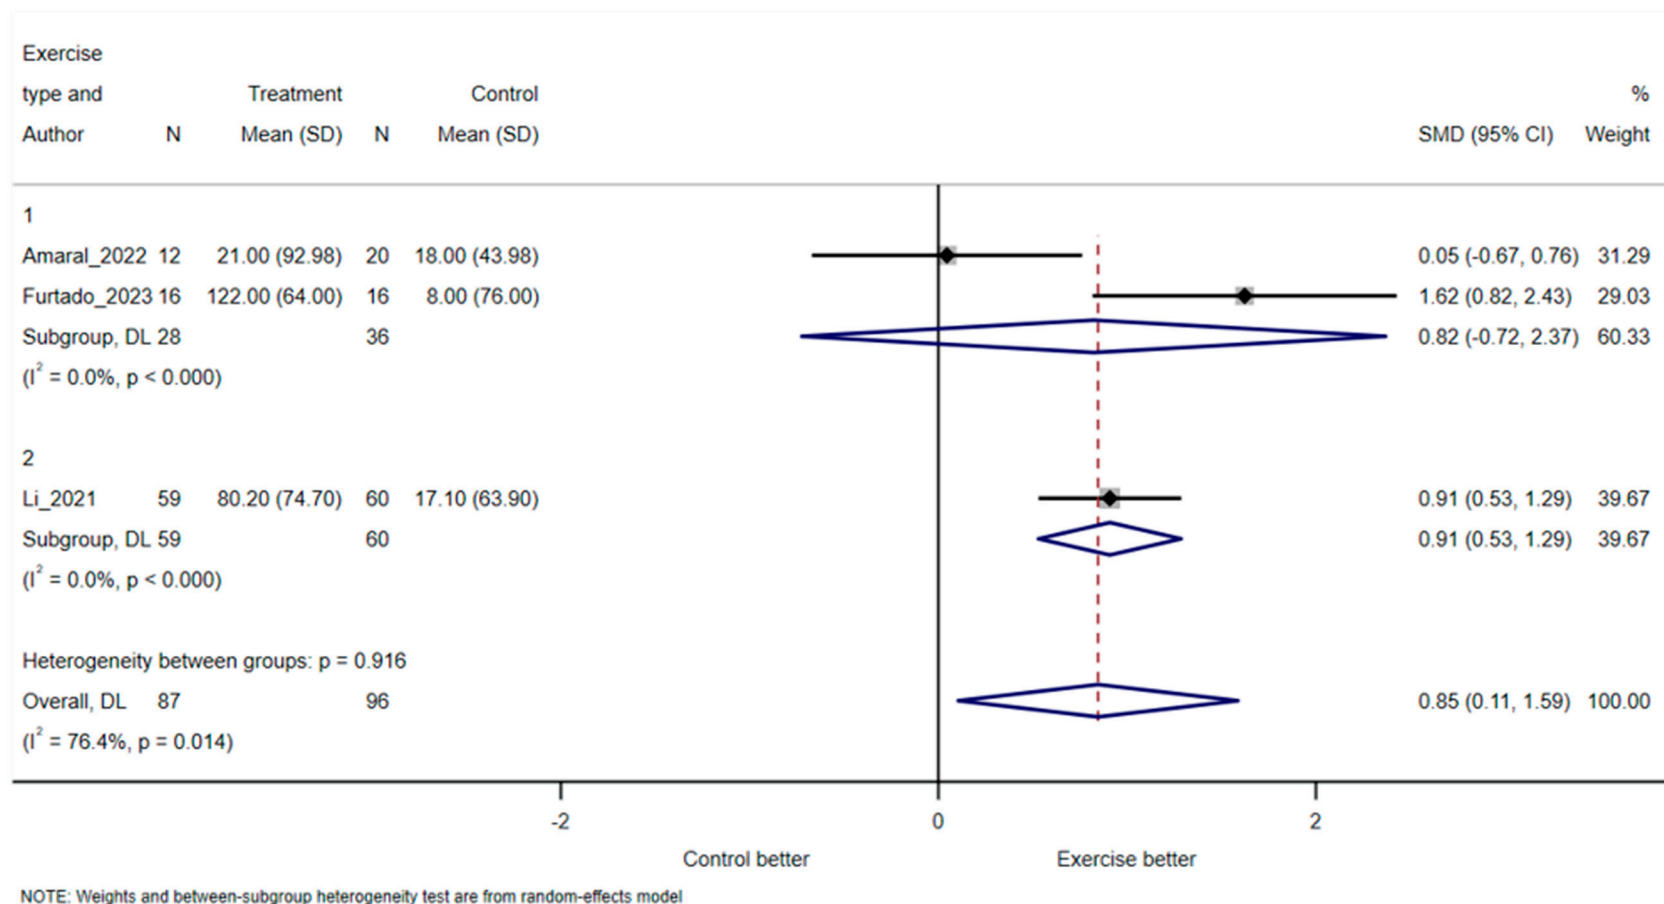

**Figure S2a** Subgroup analysis of randomized controlled trials by exercise type. CI, confidence interval; N, number of participants; SD, standard deviation; 6MWD, six-minute walk distance; SMD, standardized mean difference; 1, aerobic plus resistance exercise; 2, aerobic combined with resistance and respiratory exercise [21,39,40].

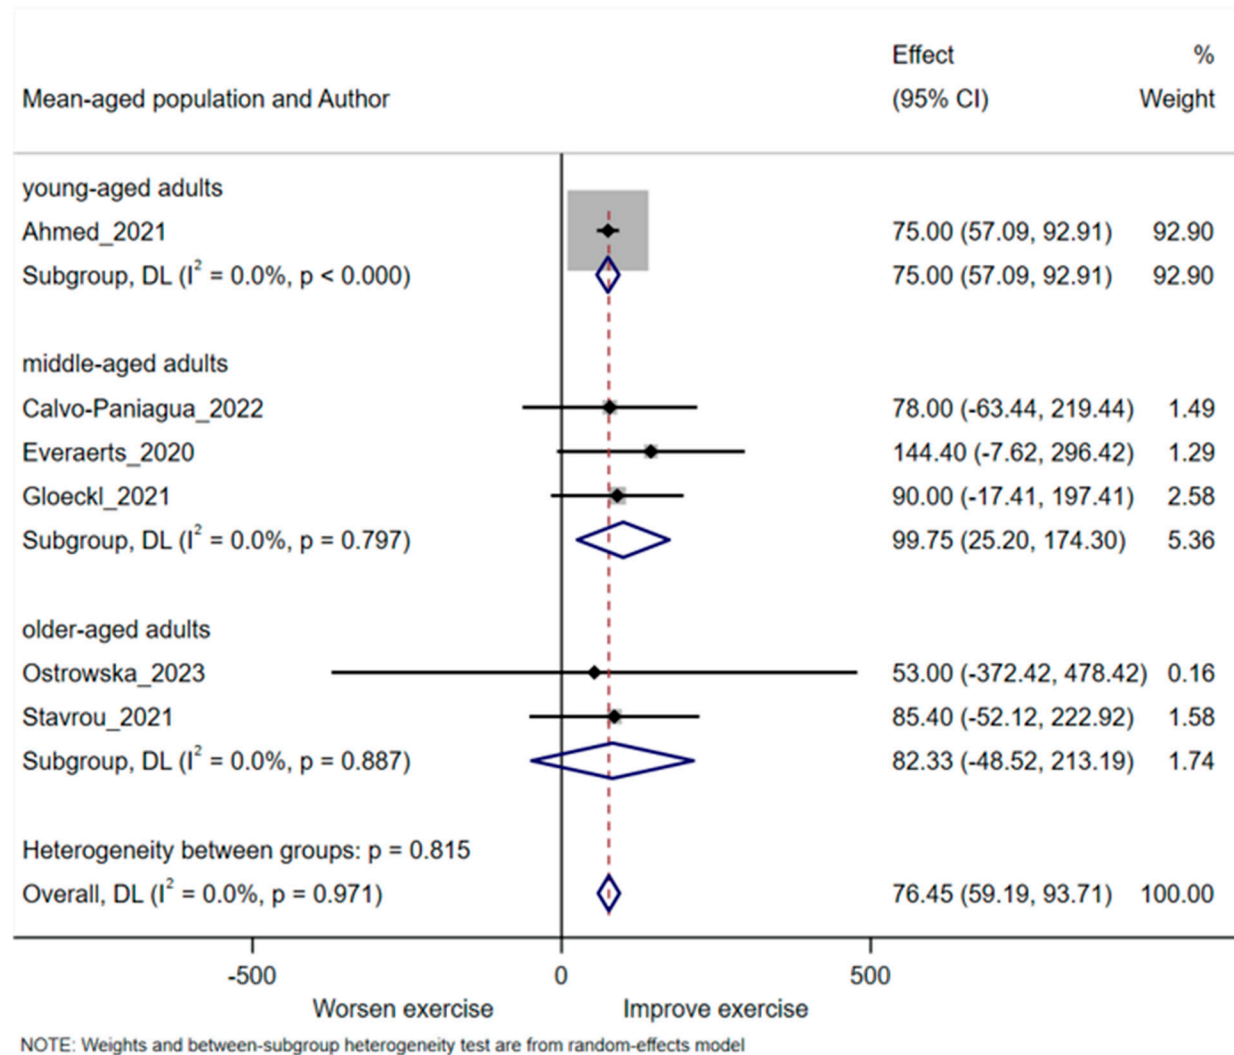

**Figure S2b** Subgroup analysis of non-randomized controlled trials by mean-aged population. CI, confidence interval; Effect, weighted mean difference; 6MWD, six-minute walk distance [20,22,42,43,44,45].

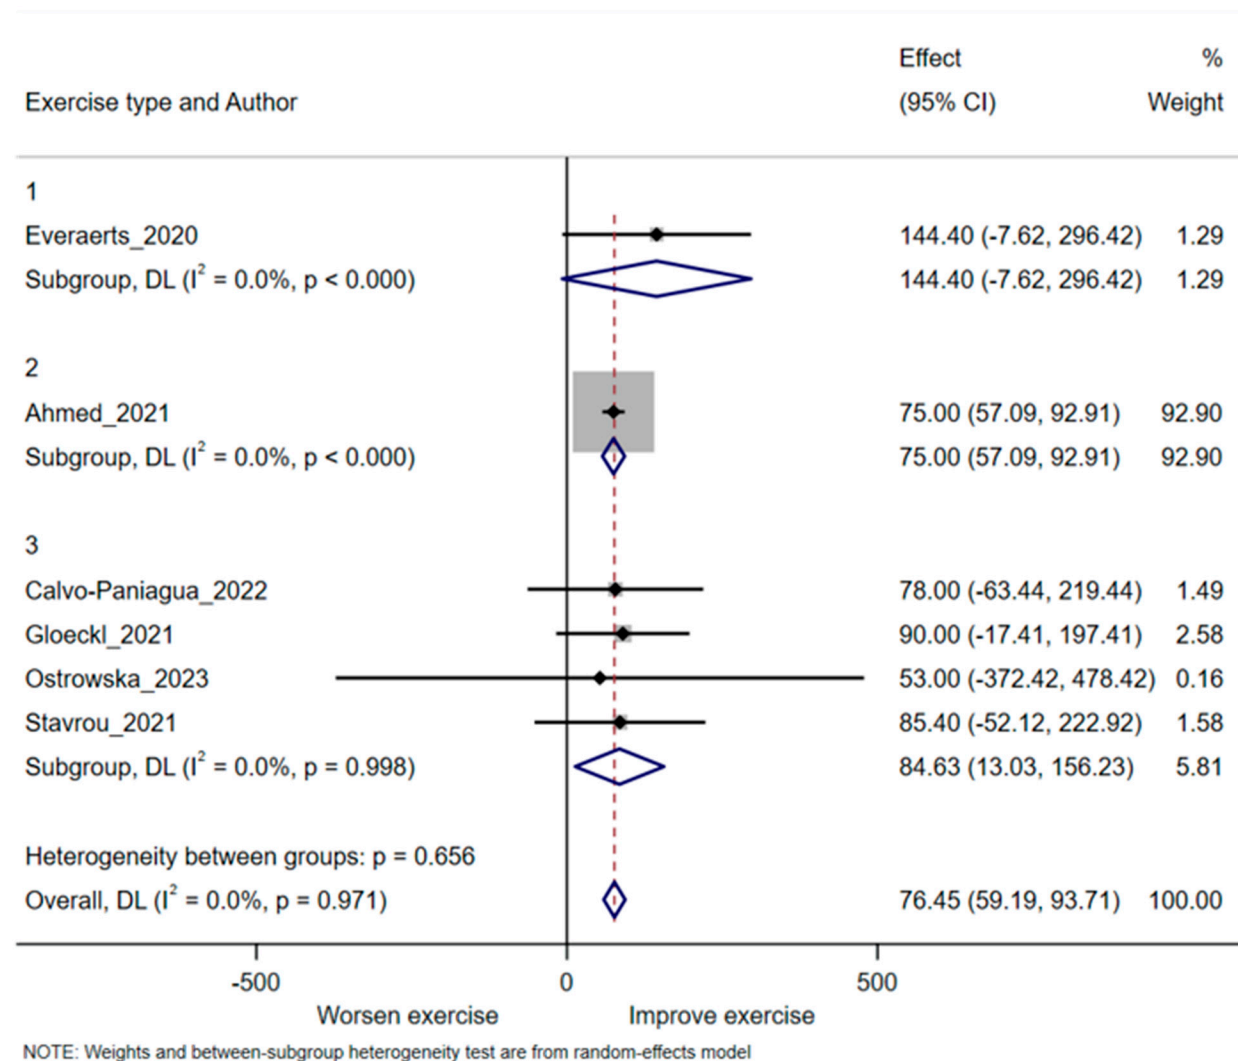

**Figure S2c** Subgroup analysis of non-randomized controlled trials by exercise type. CI, confidence interval; Effect, weighted mean difference; 6MWD, six-minute walk distance; 1, aerobic plus resistance exercises; 2, aerobic plus respiratory exercises; 3, aerobic combined with resistance and respiratory exercises [20,22,42,43,44,45].

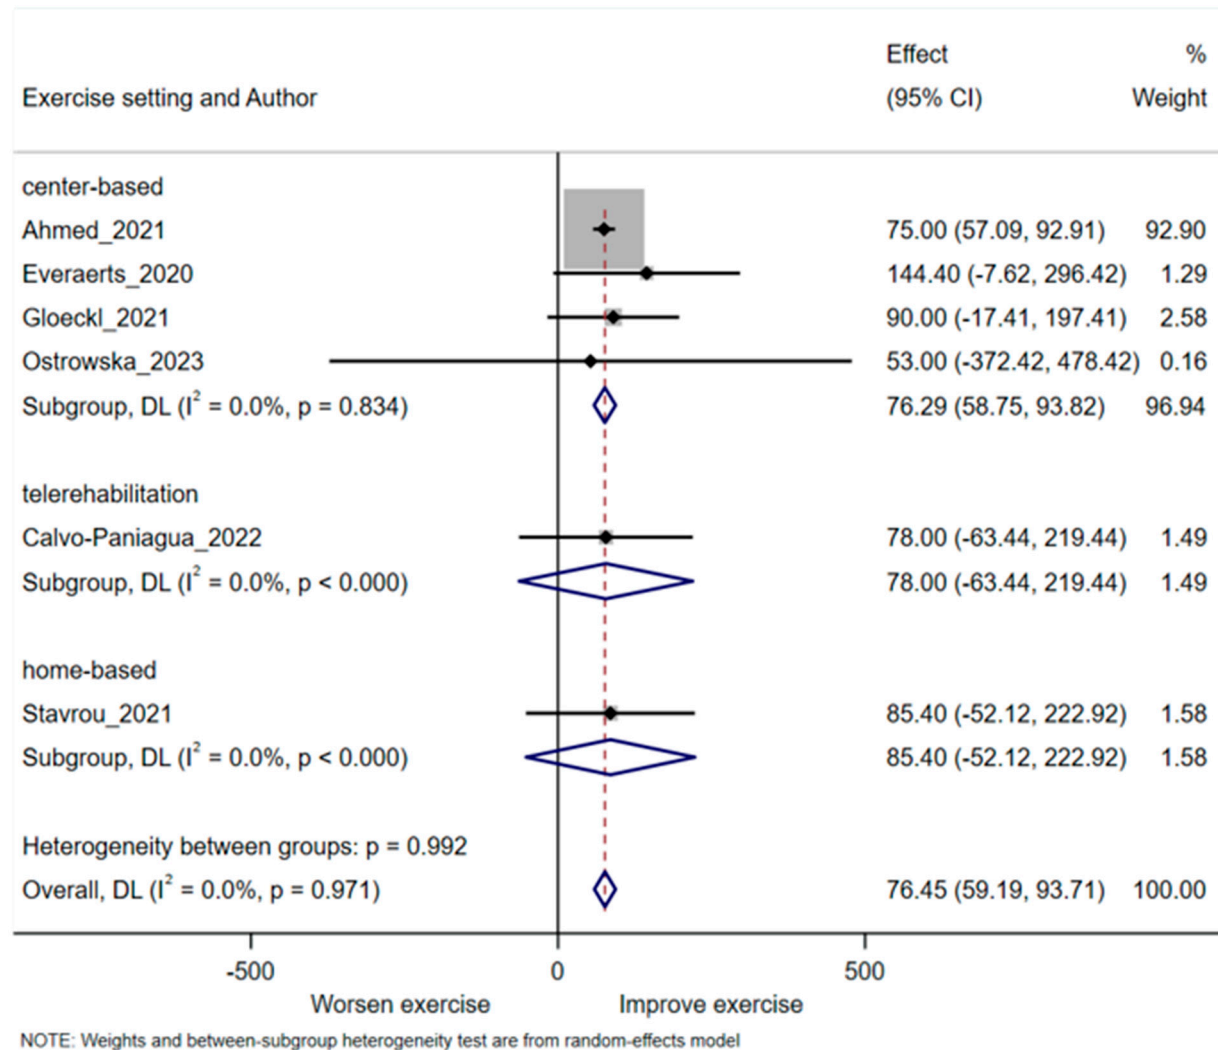

**Figure S2d** Subgroup analysis of non-randomized controlled trials by exercise setting. CI, confidence interval; Effect, weighted mean difference; 6MWD, six-minute walk distance [20,22,42,43,44,45].

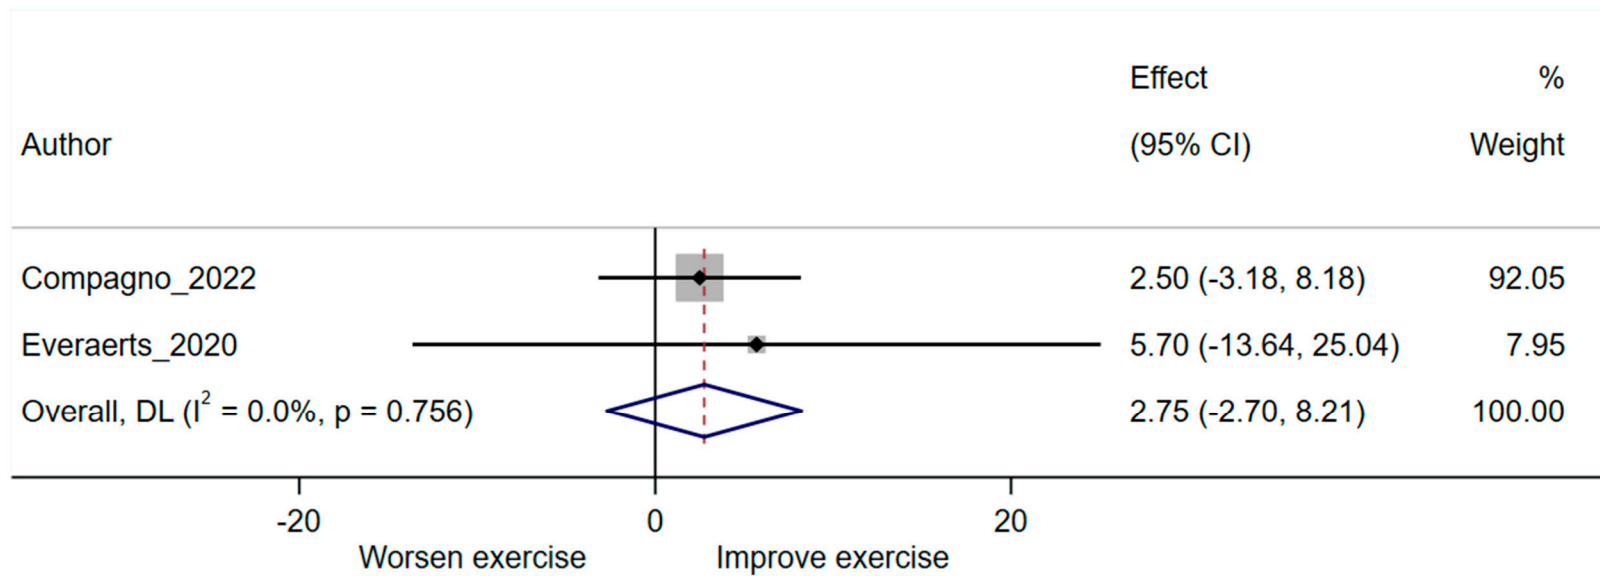

NOTE: Weights are from random-effects model

**Figure S3** Sensitivity analysis of non-randomized controlled trials for  $VO_{2peak}$  after omitting Ostrowska et al., 2023. CI, confidence interval; Effect, weighted mean difference;  $VO_{2peak}$ , peak maximum consumption [23,42].

**Figure S4** Sensitivity analysis for 6MWD

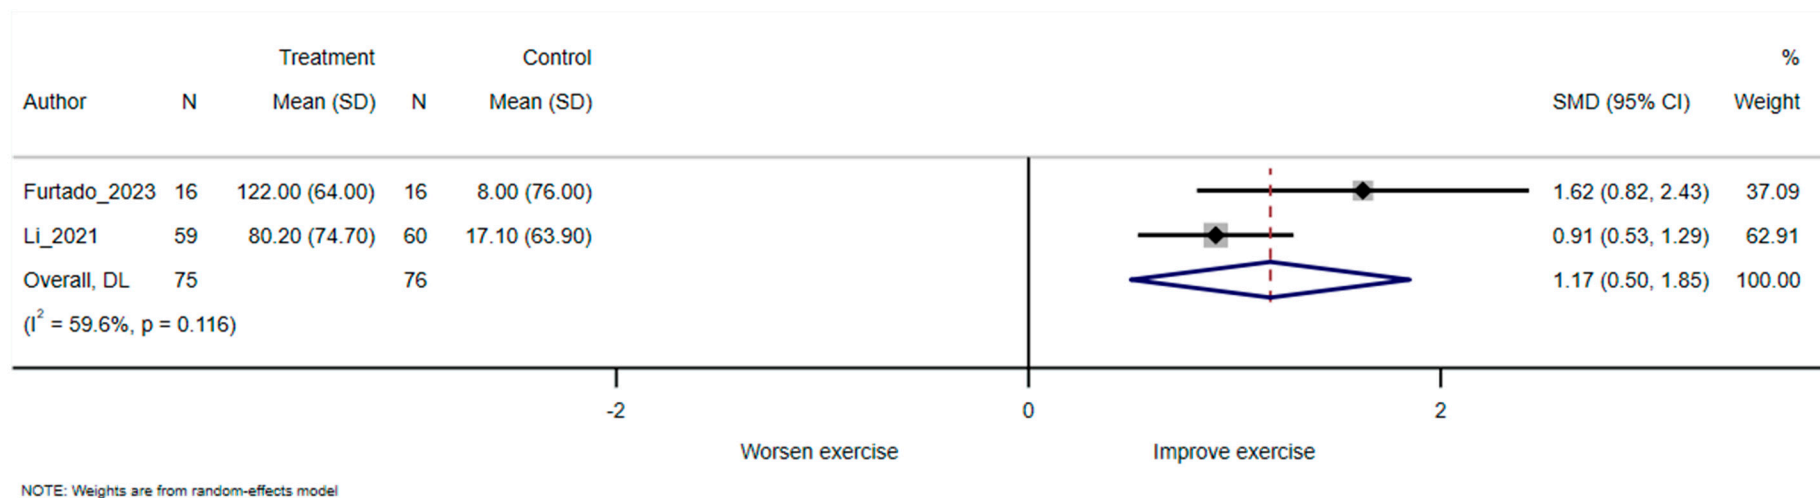

**Figure S4a** Sensitivity analysis of randomized controlled trials for 6MWD after omitting Amaral et al., 2022. CI, confidence interval; N, number of participants; SD, standard deviation; SMD, standardized mean difference; 6MWD, six-minute walk distance [39,40].

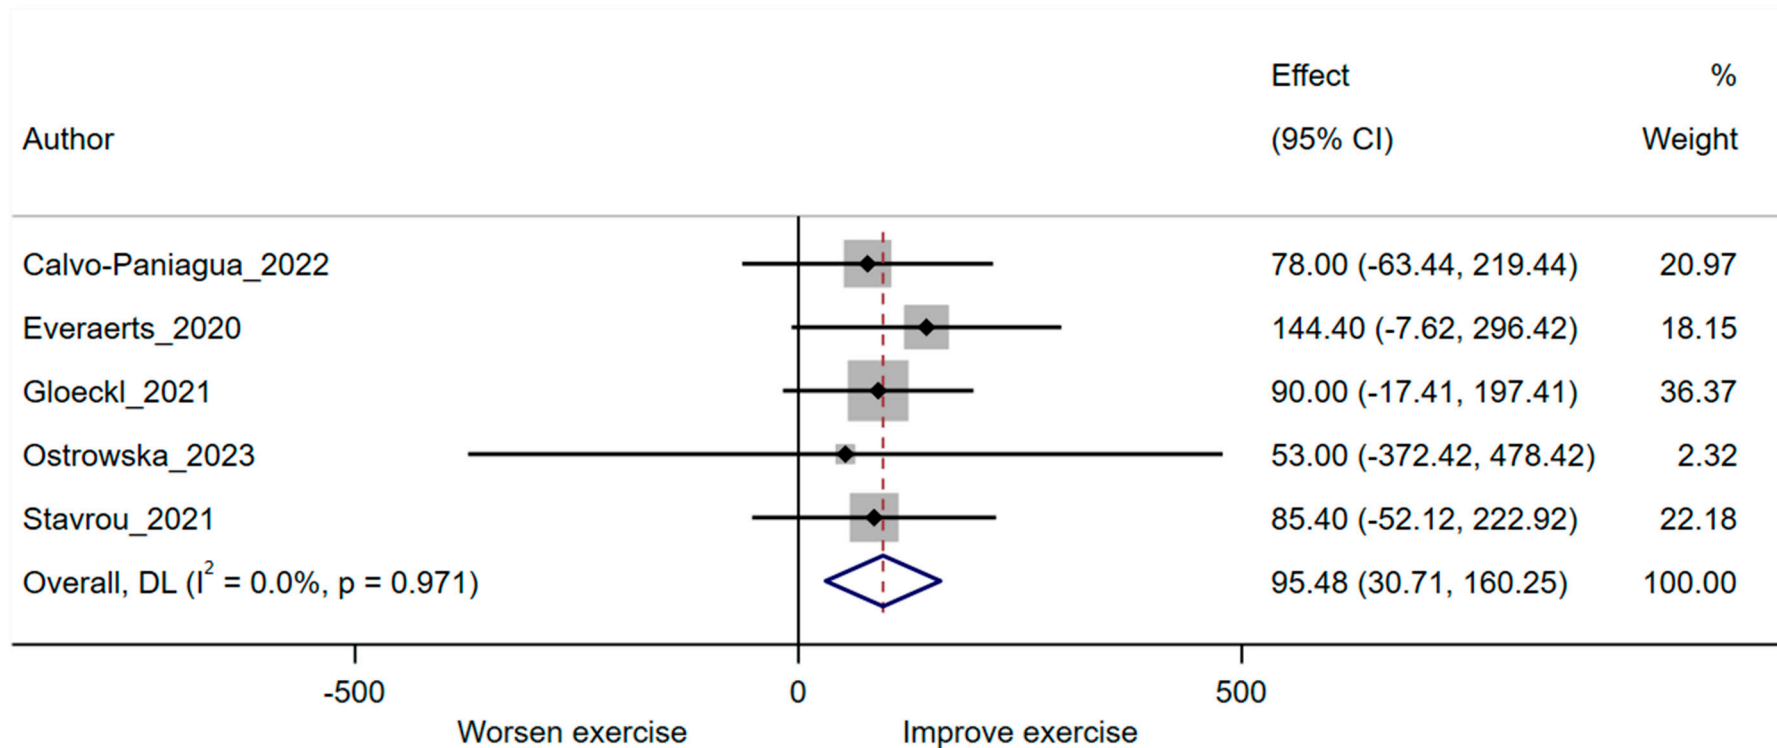

NOTE: Weights are from random-effects model

**Figure S4b** Sensitivity analysis of non-randomized controlled trials for 6MWD after omitting Ahmed et al., 2021. CI, confidence interval; Effect, weighted mean difference; 6MWD, six-minute walk distance [22,42,43,44,45].

Figure S5

a)

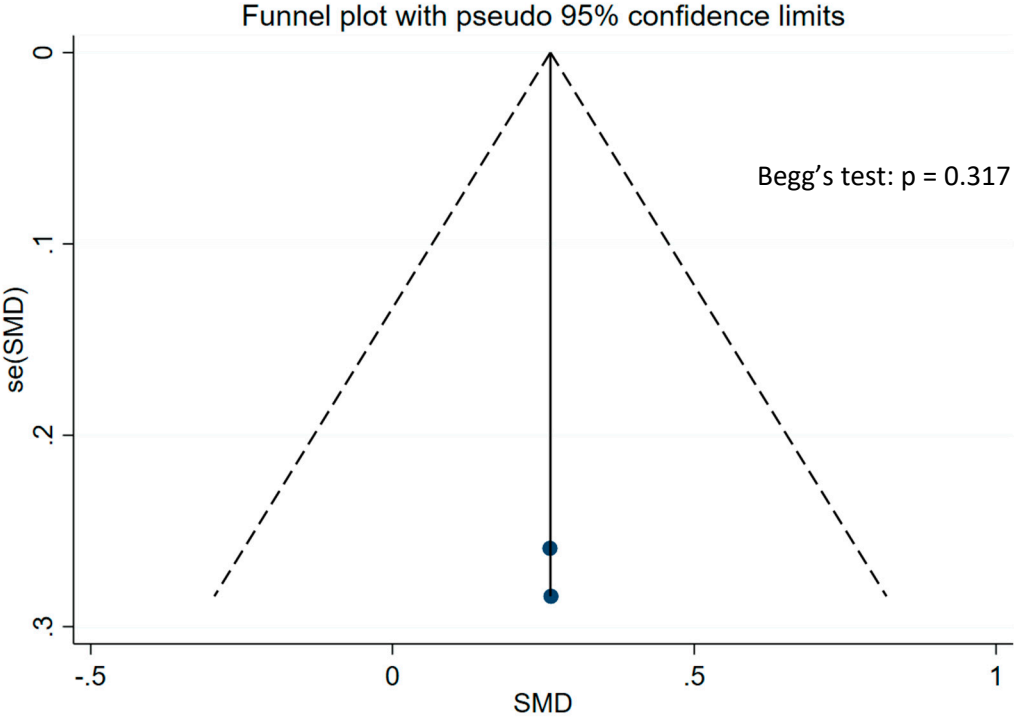



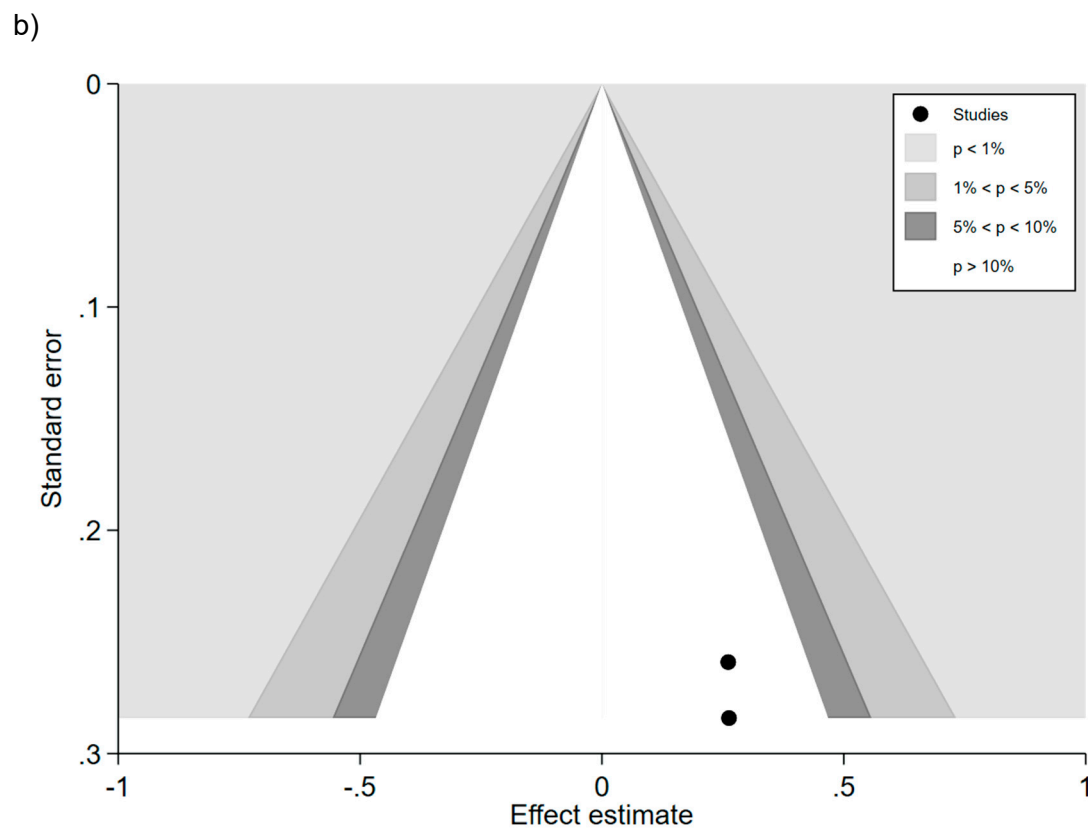

Figure S5. Publication bias of randomized controlled trials for  $VO_{2peak}$ . a) Funnel plot and Begg's test; b) Contour-enhanced funnel plot

CI, confidence interval; se, standard error; SMD, standard mean difference;  $VO_{2peak}$ , peak oxygen consumption

Figure S6

a)

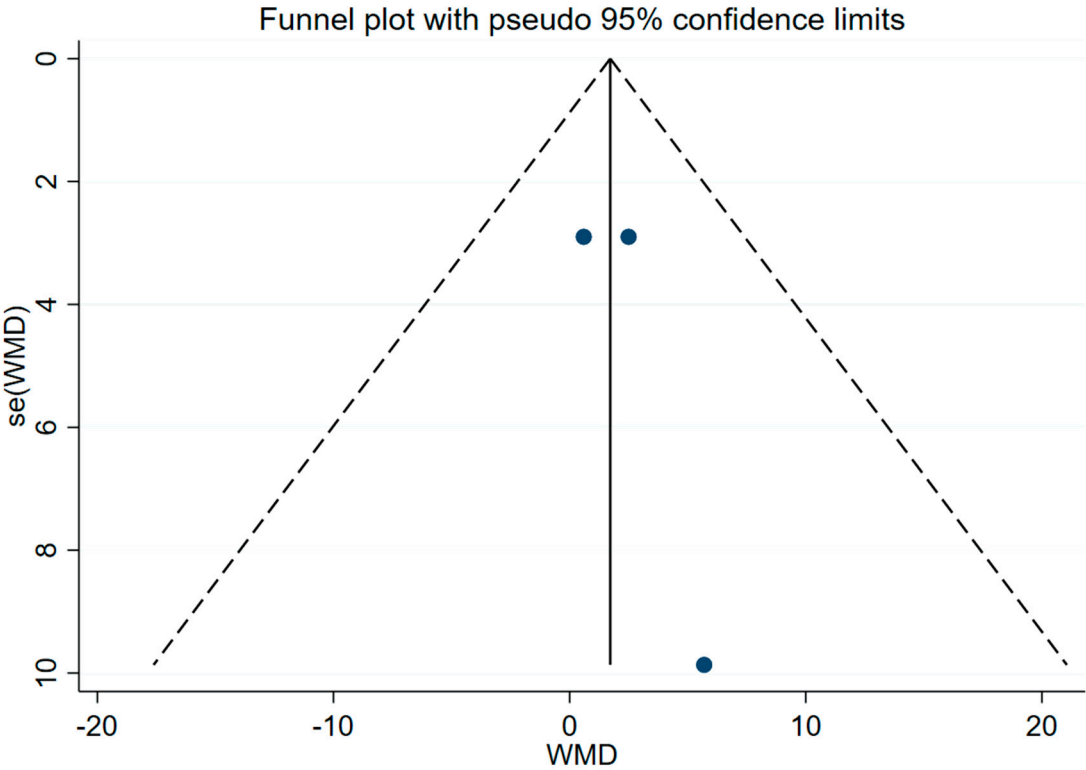

b)

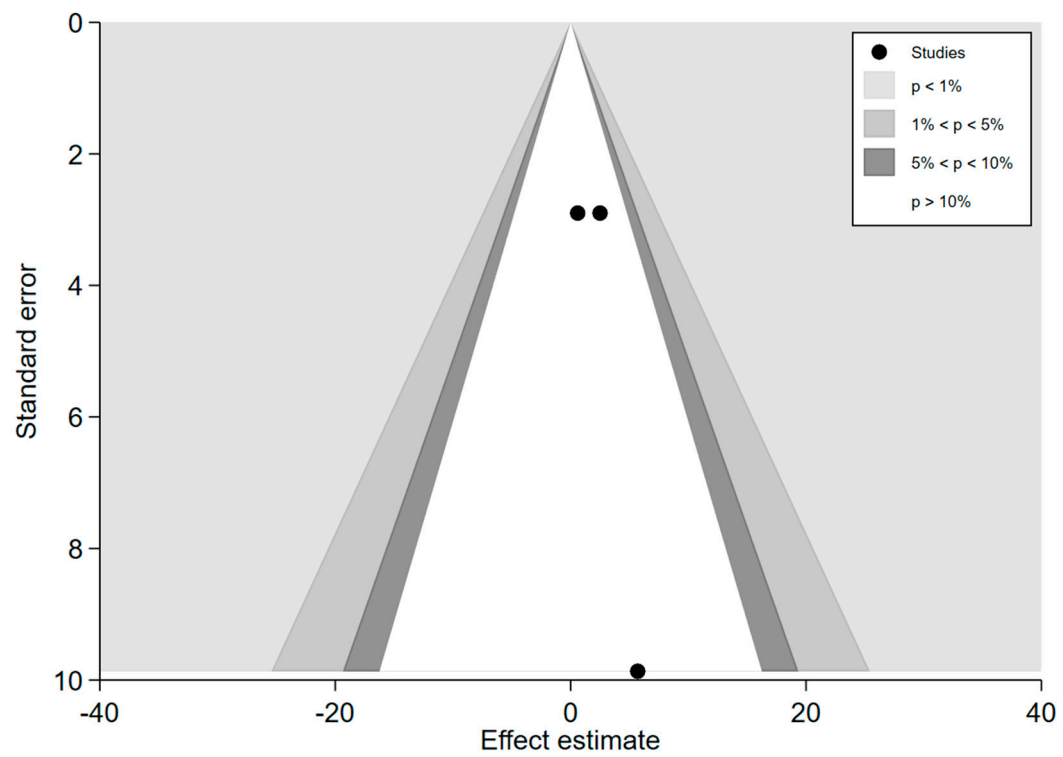

c)

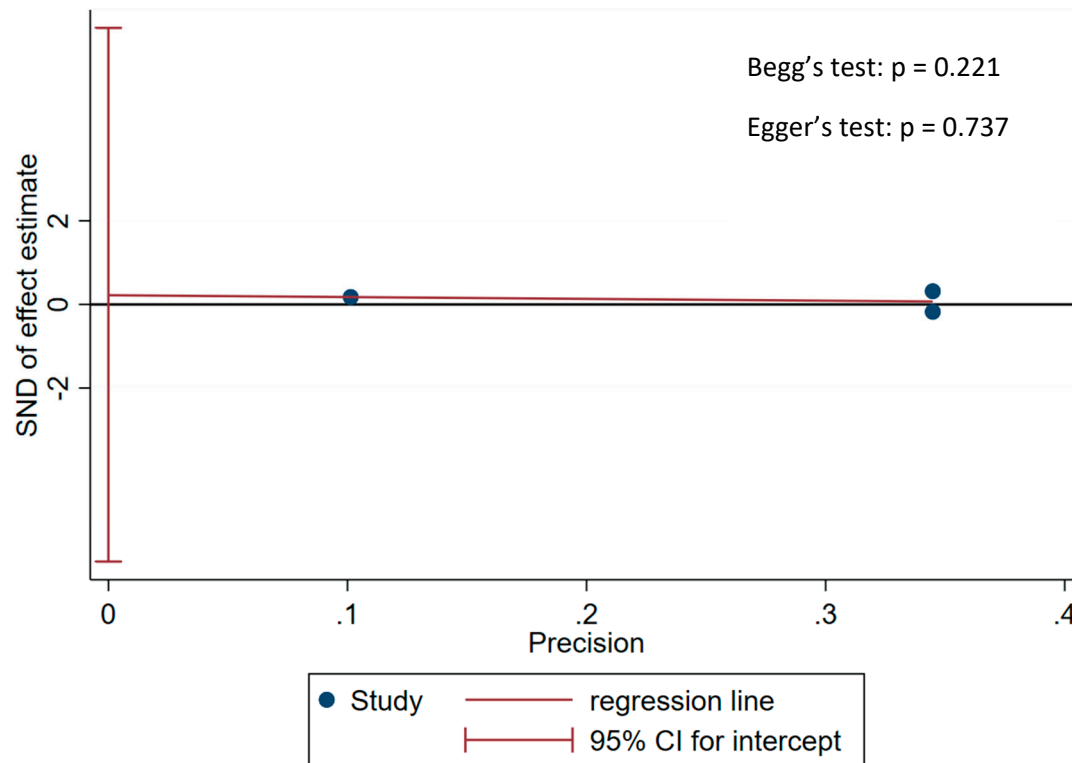

Figure S6. Publication bias of non-randomized controlled trials for  $VO_{2peak}$ . a) Funnel plot; b) Contour-enhanced funnel plot; c) Egger's graph and Begg's test

CI, confidence interval; se, standard error; SND, standard normal deviate; WMD, weighted mean difference;  $VO_{2peak}$ , peak oxygen consumption

Figure S7

a)

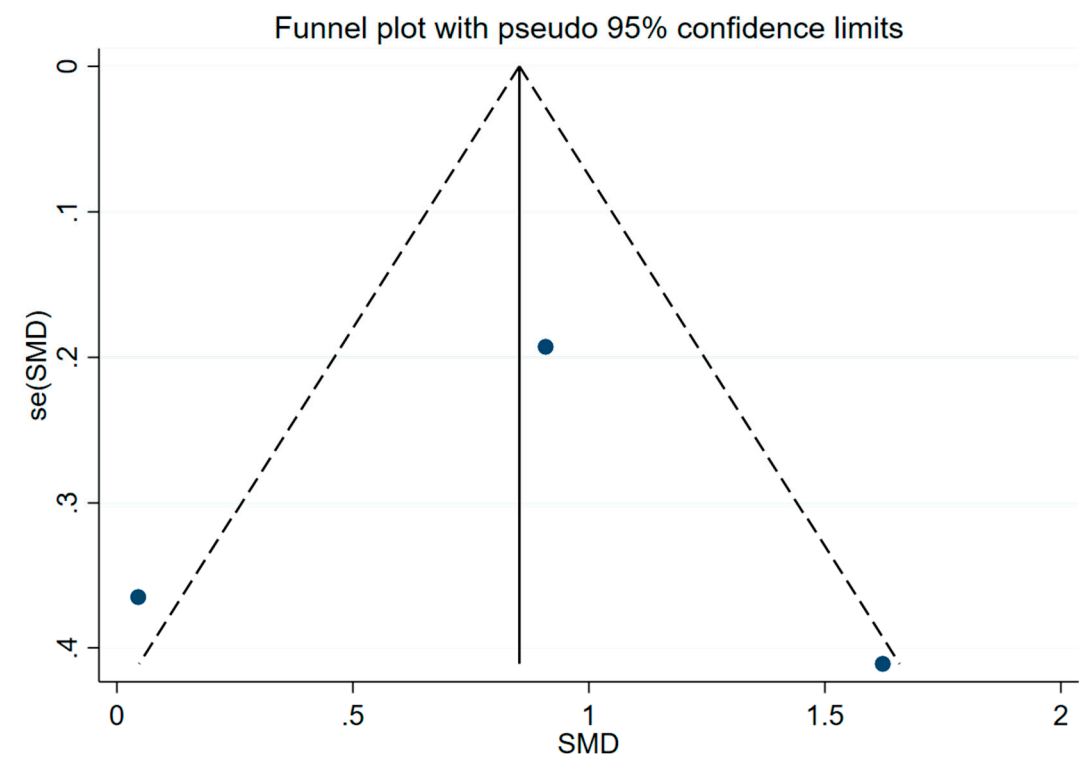

b)

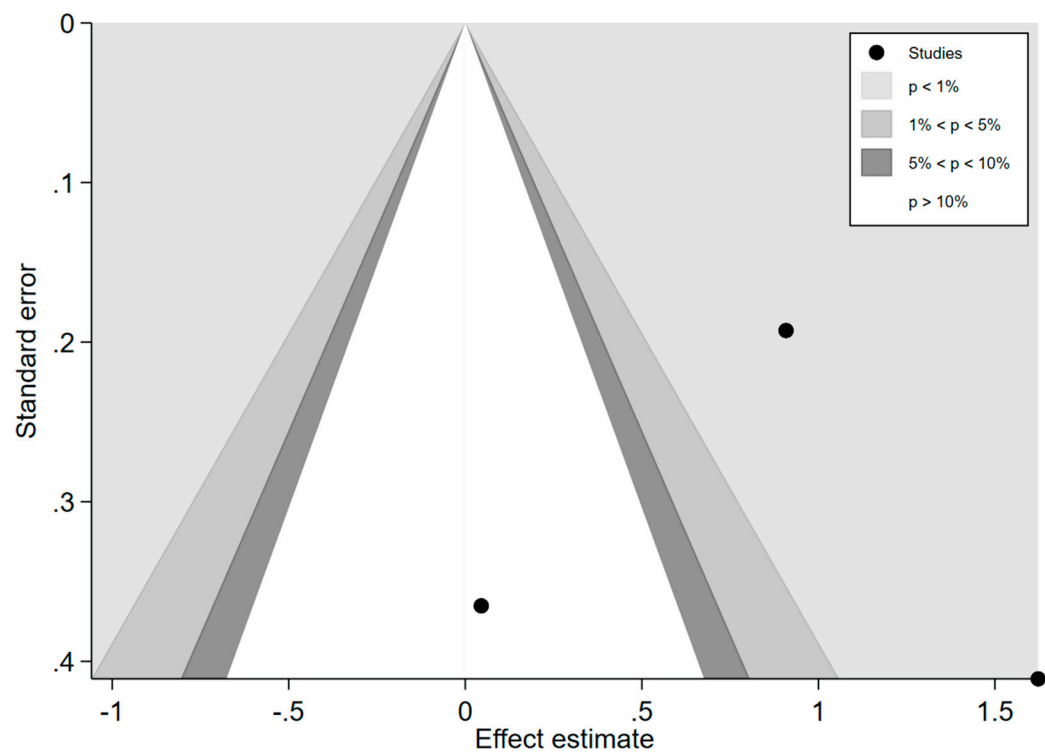

c)

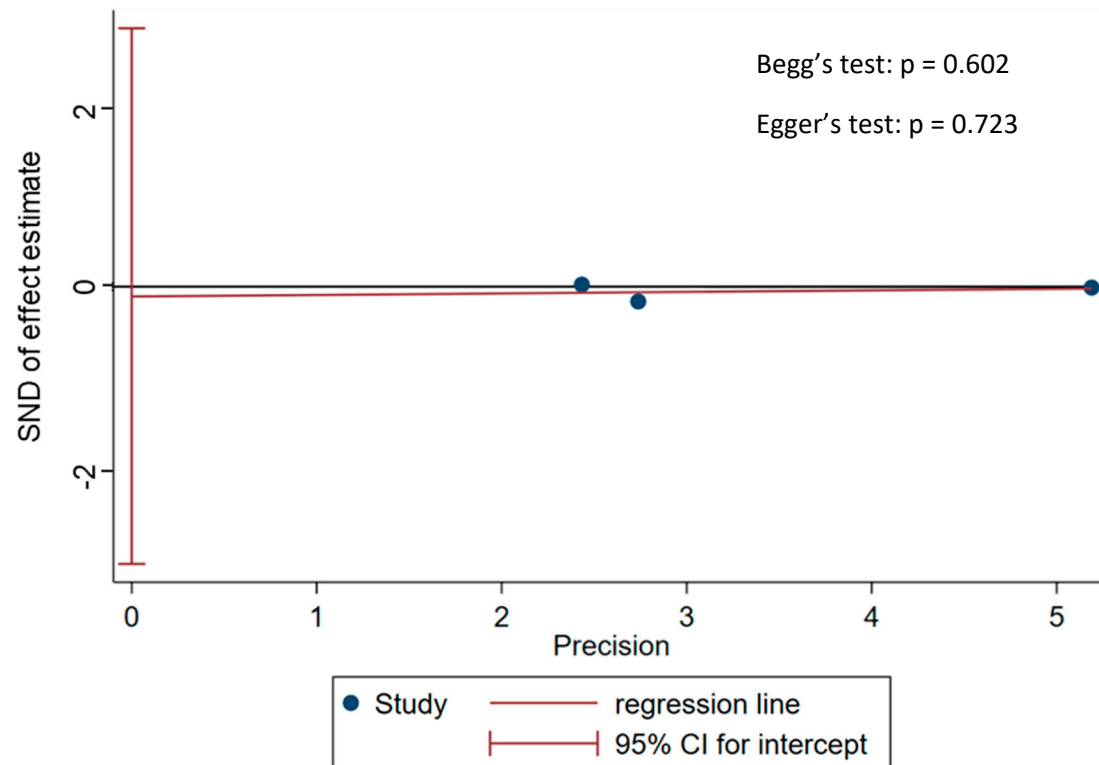

Figure S7. Publication bias of randomized controlled trials for 6MWD. a) Funnel plot; b) Contour-enhanced funnel plot; c) Egger's graph and Begg's test

CI, confidence interval; se, standard error; SMD, standardized mean difference; SND, standard normal deviate; 6MWD, six-minute walk distance

Figure S8

a)

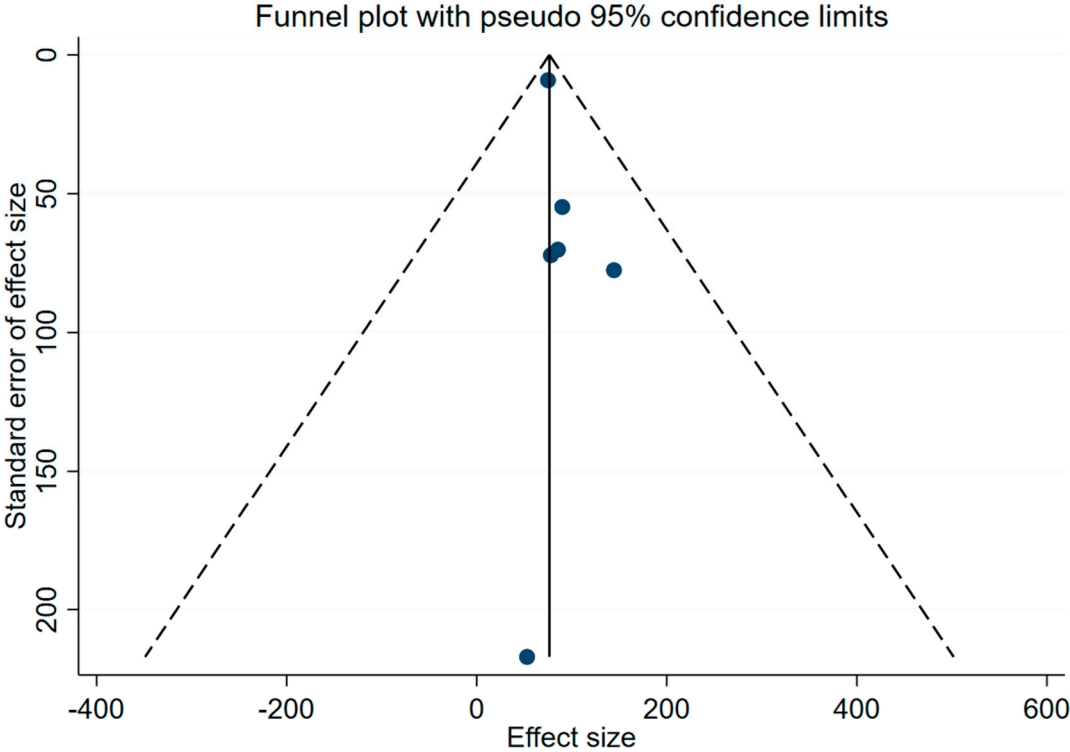



b)

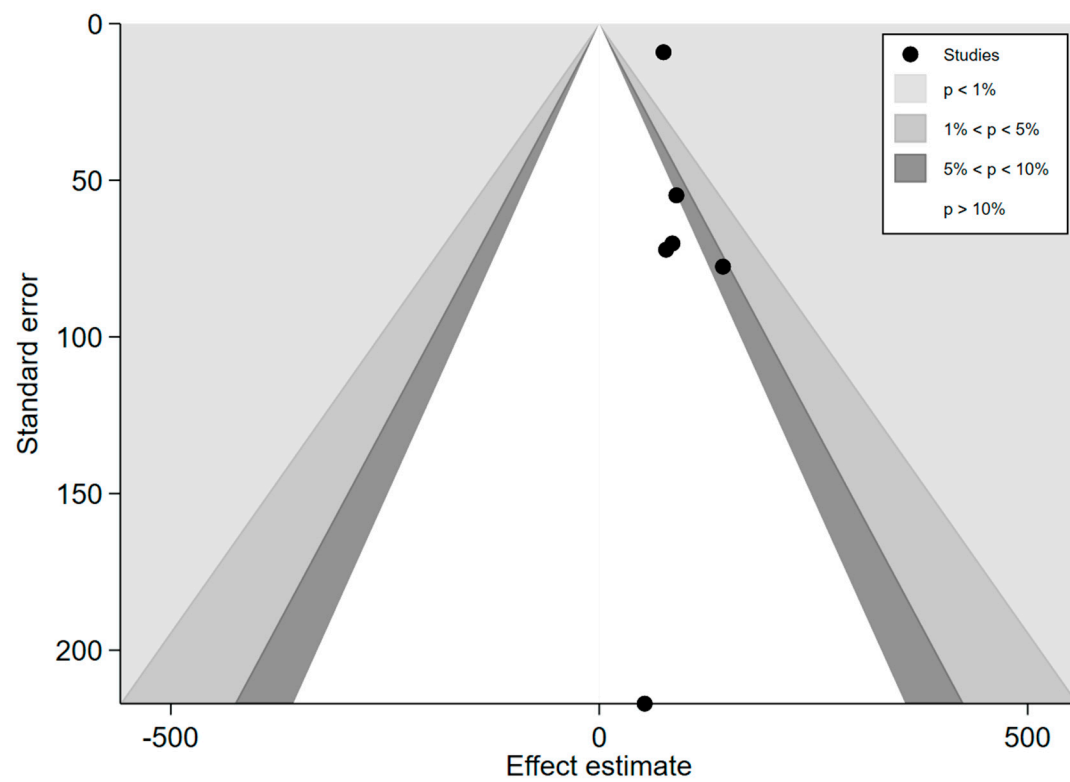

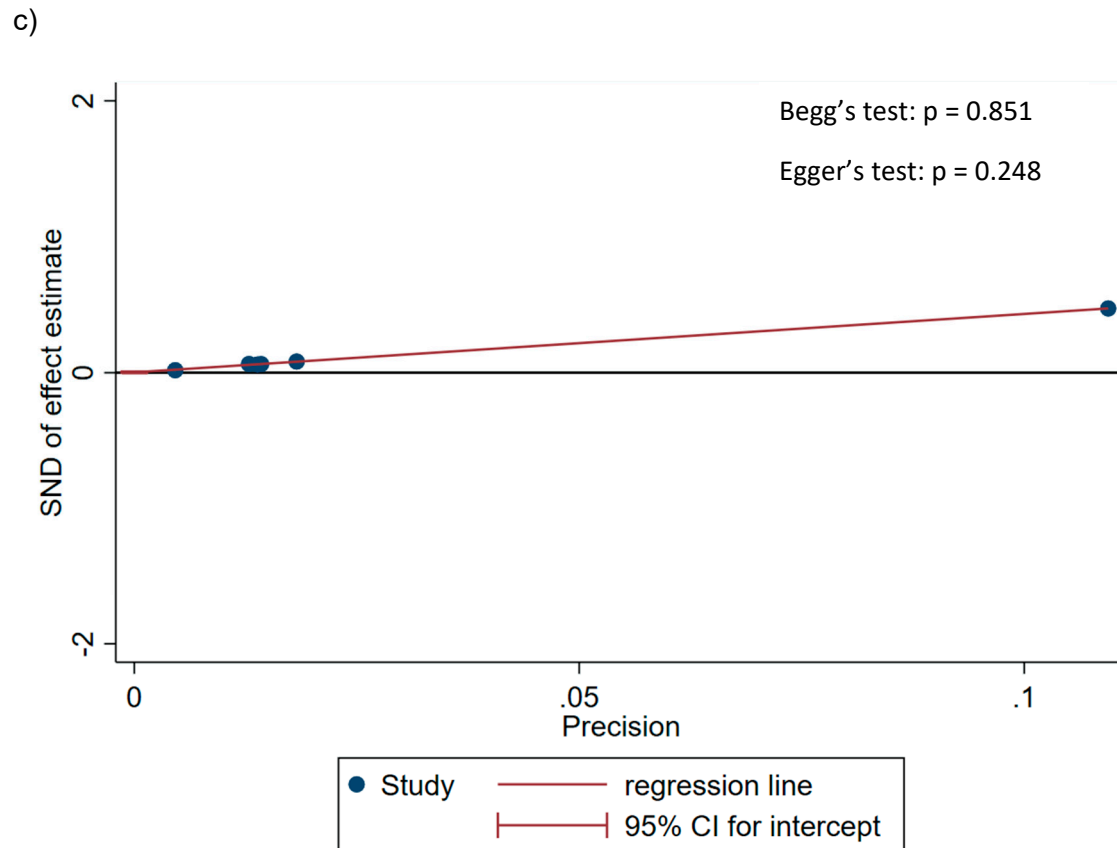

Figure S8. Publication bias of randomized controlled trials for 6MWD. a) Funnel plot; b) Contour-enhanced funnel plot; c) Egger's graph and Begg's test

CI, confidence interval; se, standard error; SMD, standardized mean difference; SND, standard normal deviate; 6MWD, six-minute walk distance
